# Supplementary material
Source: PubMed Central journal article supplement (PMC2781049)
Supplement: supp_136_24_4089__3.pdf [file supp_136_24_4089__3.pdf]

**Table S3. Overexpression of Notch or Fringe bypasses *spdo* function during the asymmetric division of *Svp-lacZ*<sup>+</sup> precursors to produce sibling *Svp-lacZ*<sup>+</sup> pericardial cells ('A') and cardioblasts ('B')**

| Genotype                                      | Temp. | Asymmetric divisions (A, B) % | Symmetric divisions (B, B) % | Symmetric divisions (A, A) % | <i>N</i> | <i>n</i> |
|-----------------------------------------------|-------|-------------------------------|------------------------------|------------------------------|----------|----------|
| Wild type*                                    | 25    | 100                           | 0                            | 0                            | 47       | 1001     |
|                                               | 18    | 100                           | 0                            | 0                            | 49       | 945      |
| <i>spdo</i> <sup>G104/ZZZ7</sup>              | 25    | 13.5                          | 86.5                         | 0                            | 27       | 459      |
|                                               | 18    | 57.4                          | 41.9                         | 0.8                          | 26       | 488      |
| <i>spdo</i> <sup>AC81/ZZZ7</sup>              | 25    | 25.6                          | 74.4                         | 0                            | 29       | 548      |
|                                               | 18    | 64.0                          | 30.5                         | 5.6                          | 42       | 827      |
| <i>numb</i> <sup>2</sup>                      | 25    | 0.9                           | 0                            | 99.1                         | 20       | 229      |
| <i>o/e</i> <sup>†</sup> GFP                   | 25    | 99.8                          | 0.1                          | 0.1                          | 53       | 848      |
| <i>o/e</i> GFP; <i>spdo</i> <sup>-‡</sup>     | 25    | 56.6                          | 39.6                         | 3.8                          | 44       | 875      |
| <i>o/e</i> Spdo                               | 25    | 99.8                          | 0.1                          | 0.1                          | 53       | 829      |
| <i>o/e</i> Spdo; <i>spdo</i> <sup>-</sup>     | 25    | 98.8                          | 0.8                          | 0.4                          | 50       | 843      |
| <i>o/e</i> Notch                              | 25    | 94.0                          | 0                            | 6.0                          | 51       | 949      |
|                                               | 18    | 89.4                          | 0                            | 10.6                         | 49       | 881      |
| <i>o/e</i> Notch; <i>spdo</i> <sup>-</sup>    | 25    | 55.9                          | 21.3                         | 22.7                         | 52       | 942      |
|                                               | 18    | 34.9                          | 1.6                          | 63.6                         | 56       | 835      |
| <i>o/e</i> Fringe                             | 25    | 14.2                          | 0                            | 85.8                         | 47       | 910      |
|                                               | 18    | 25.4                          | 0                            | 74.6                         | 65       | 843      |
| <i>o/e</i> Fringe; <i>spdo</i> <sup>-</sup>   | 25    | 2.0                           | 0                            | 98.0                         | 47       | 895      |
|                                               | 18    | 2.7                           | 0                            | 97.3                         | 63       | 803      |
| <i>o/e</i> Delta                              | 25    | 99.4                          | 0.36                         | 0.24                         | 54       | 838      |
| <i>o/e</i> Delta; <i>spdo</i> <sup>-</sup>    | 25    | 40.9                          | 58.6                         | 0.5                          | 50       | 856      |
|                                               | 18    | 66.1                          | 26.4                         | 7.5                          | 28       | 570      |
| <i>o/e</i> Neur                               | 25    | 98.7                          | 1.3                          | 0                            | 55       | 875      |
| <i>o/e</i> Neur; <i>spdo</i> <sup>-</sup>     | 25    | 62.5                          | 31.9                         | 5.6                          | 49       | 834      |
|                                               | 18    | 68.0                          | 9.0                          | 23.1                         | 20       | 490      |
| <i>o/e</i> Neur, Delta                        | 25    | 99.0                          | 0.6                          | 0.4                          | 46       | 977      |
| <i>o/e</i> Neur, DI; <i>spdo</i> <sup>-</sup> | 25    | 68.2                          | 24.9                         | 7.0                          | 44       | 848      |
| <i>o/e</i> Sec15                              | 25    | 99.7                          | 0                            | 0.3                          | 28       | 291      |
| <i>o/e</i> Sec15; <i>spdo</i> <sup>-</sup>    | 25    | 32.1                          | 67.6                         | 0.3                          | 63       | 1279     |

\*Wild type refers to *twist-Gal4/+; UAS-GFP/+; Svp-lacZ/+*.

<sup>†</sup>*o/e* refers to *twist-GAL4*-mediated overexpression of the indicated gene.

<sup>‡</sup>*spdo*<sup>-</sup> refers to *spdo*<sup>G104/Svp-lacZ spdo</sup><sup>ZZZ7</sup> mutant embryos.

*N*, number of embryos scored; *n*, number of precursor divisions scored.
